# Supplementary material for: High Throughput Preparation of Ag-Zn Alloy Thin Films for the Electrocatalytic Reduction of CO2 to CO
Source: MDPI journal article supplement (doi:10.3390/ma15196892), 2022-10-04
Supplement: s1 [file s1]

# Supplementary Materials

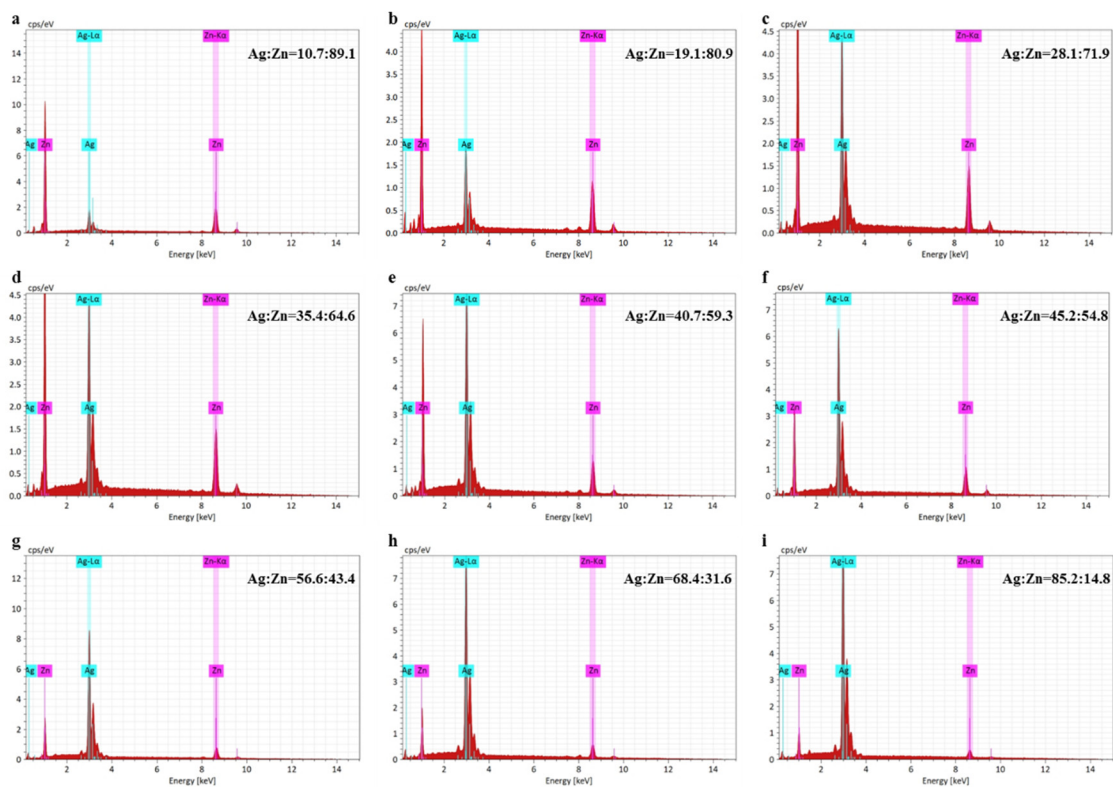

**Figure S1.** Typical EDX spectra of (a)  $\text{Ag}_{10}\text{Zn}_{90}$ , (b)  $\text{Ag}_{20}\text{Zn}_{80}$ , (c)  $\text{Ag}_{30}\text{Zn}_{70}$ , (d)  $\text{Ag}_{35}\text{Zn}_{65}$ , (e)  $\text{Ag}_{40}\text{Zn}_{60}$ , (f)  $\text{Ag}_{45}\text{Zn}_{55}$ , (g)  $\text{Ag}_{55}\text{Zn}_{45}$ , (h)  $\text{Ag}_{70}\text{Zn}_{30}$  and (i)  $\text{Ag}_{85}\text{Zn}_{15}$  films .

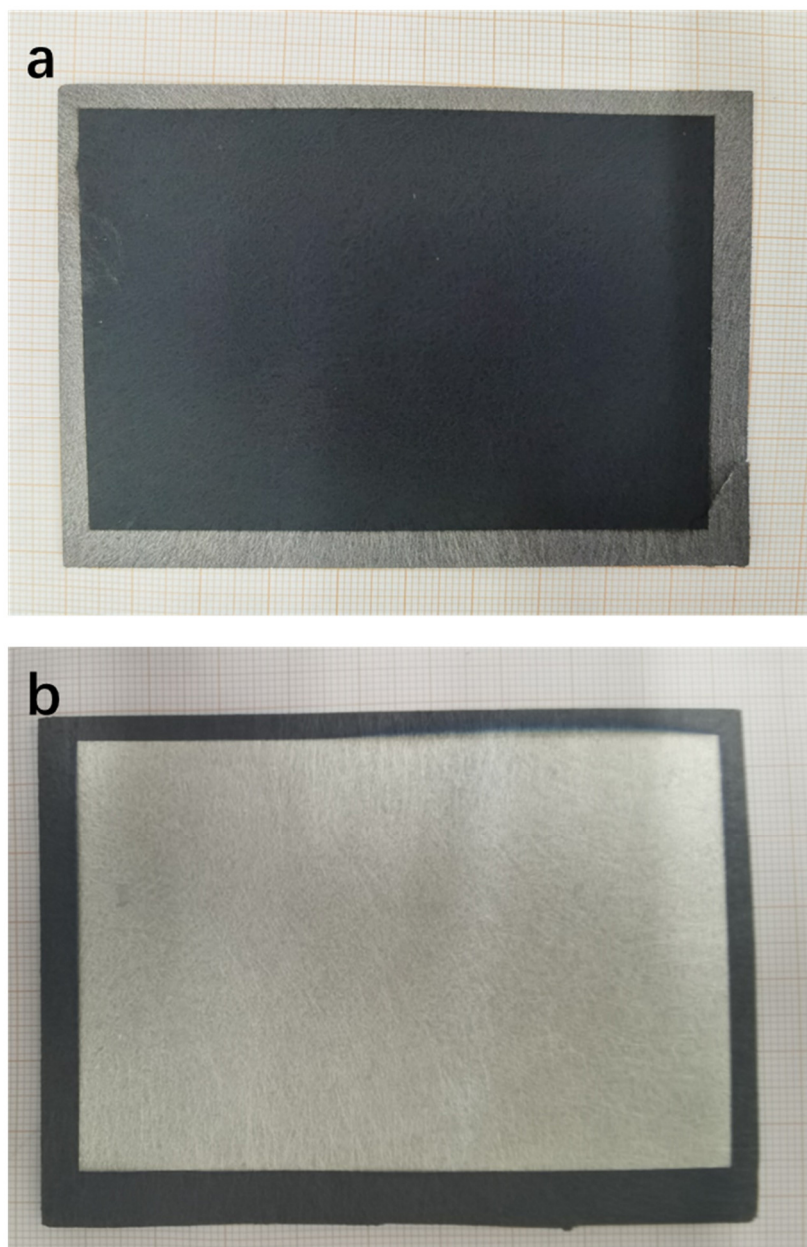

**Figure S2.** Macroscopic view of the (a) Zn film and (b) Ag film.

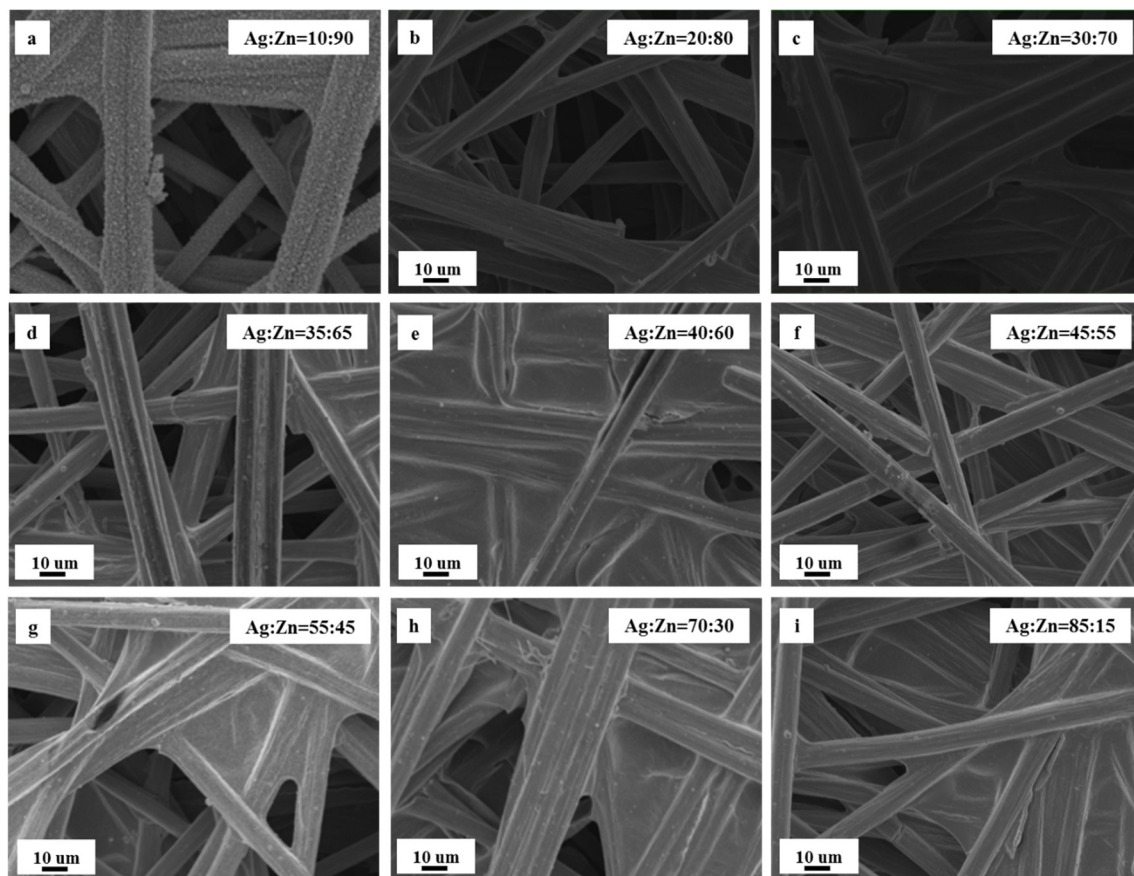

**Figure S3.** SEM images of (a)  $\text{Ag}_{10}\text{Zn}_{90}$ , (b)  $\text{Ag}_{20}\text{Zn}_{80}$ , (c)  $\text{Ag}_{30}\text{Zn}_{70}$ , (d)  $\text{Ag}_{35}\text{Zn}_{65}$ , (e)  $\text{Ag}_{40}\text{Zn}_{60}$ , (f)  $\text{Ag}_{45}\text{Zn}_{55}$ , (g)  $\text{Ag}_{55}\text{Zn}_{45}$ , (h)  $\text{Ag}_{70}\text{Zn}_{30}$  and (i)  $\text{Ag}_{85}\text{Zn}_{15}$  films.

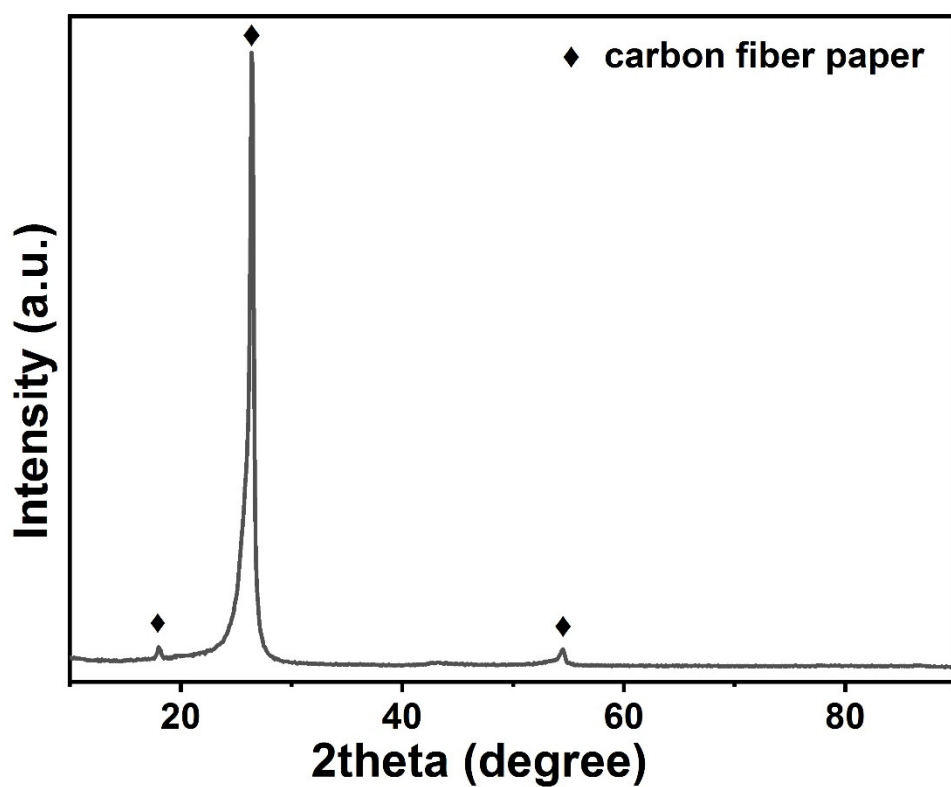

**Figure S4.** XRD pattern of the CFP.

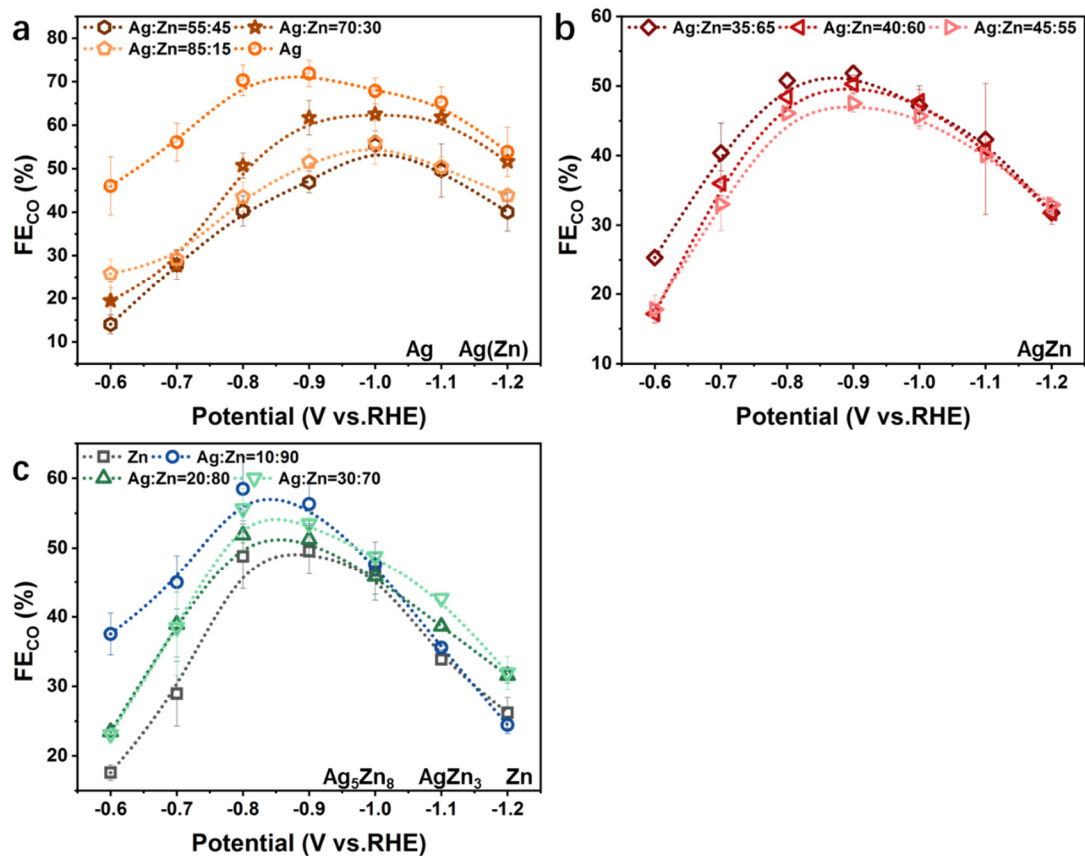

Figure S5. FE<sub>CO</sub> for the (a) Ag, Ag(Zn), (b) AgZn, (c) Ag<sub>5</sub>Zn<sub>8</sub>, AgZn<sub>3</sub>, and Zn phase catalysts.

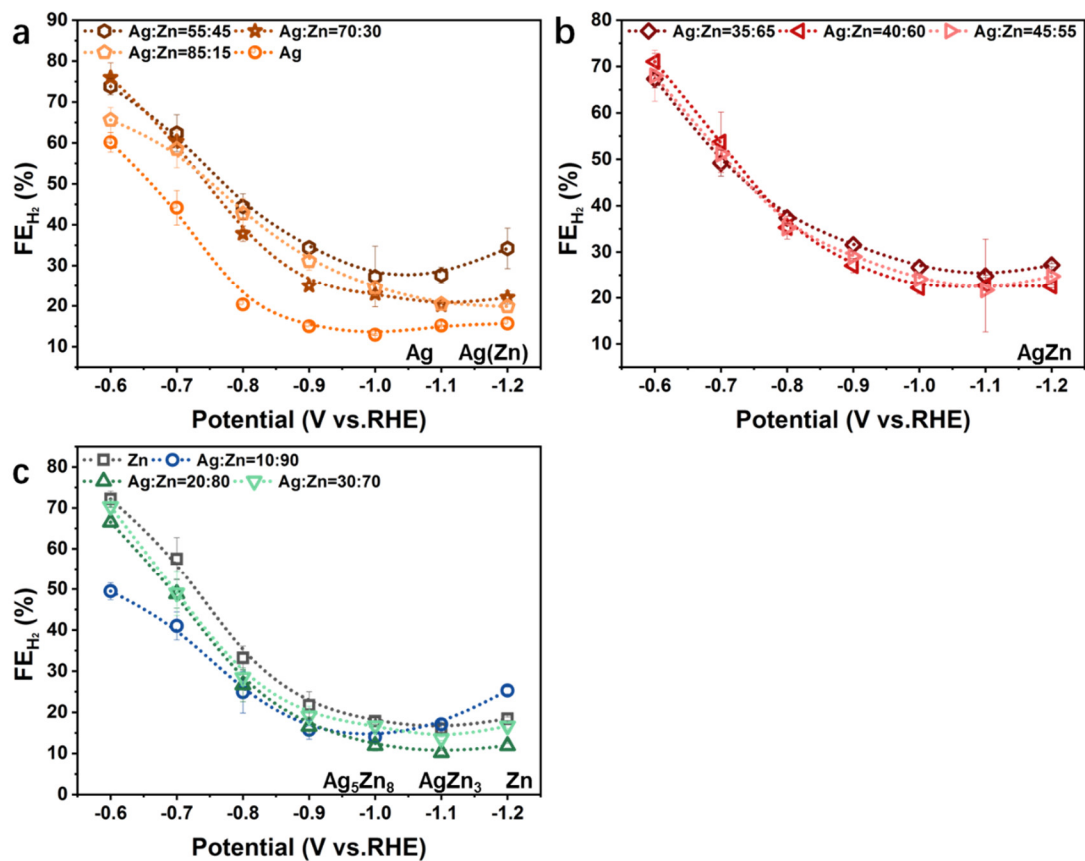

Figure S6. FE<sub>H<sub>2</sub></sub> for the (a) Ag, Ag(Zn), (b) AgZn, (c) Ag<sub>5</sub>Zn<sub>8</sub>, AgZn<sub>3</sub>, and Zn phase catalysts.

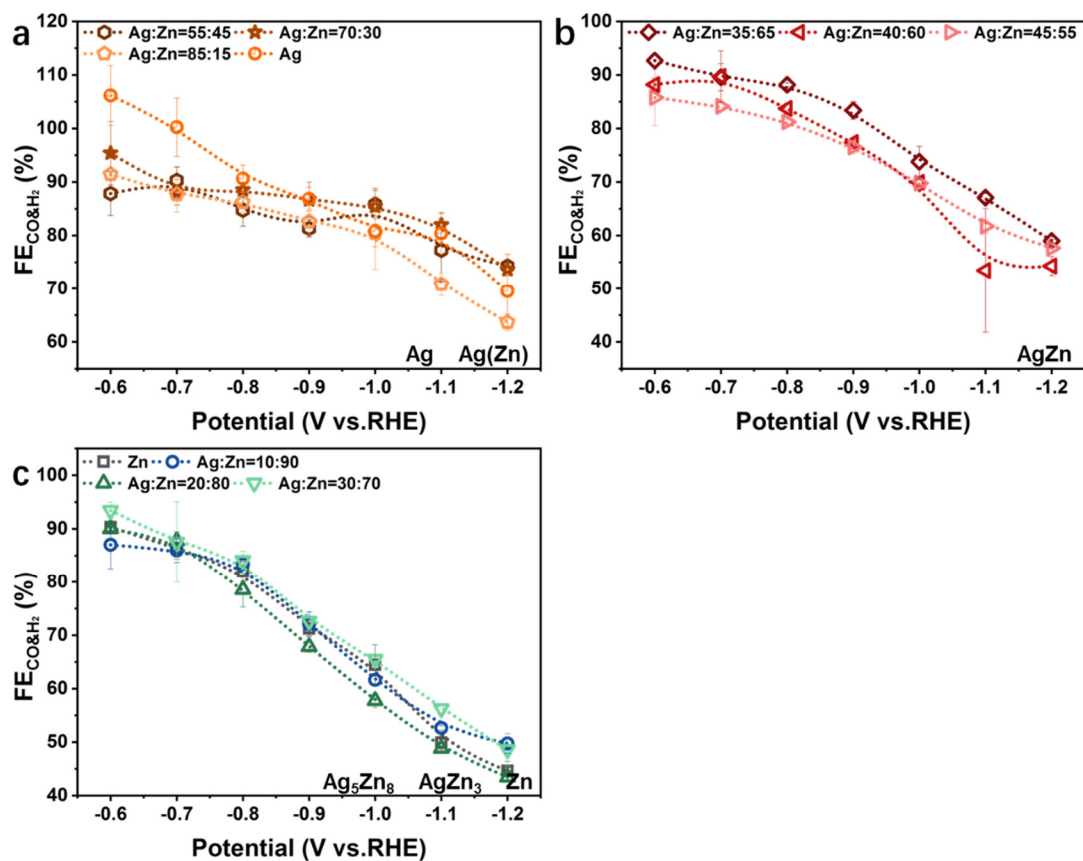

Figure S7.  $FE_{CO\&H_2}$  for the (a) Ag, Ag(Zn), (b) AgZn, (c) Ag<sub>5</sub>Zn<sub>8</sub>, AgZn<sub>3</sub>, and Zn phase catalysts.

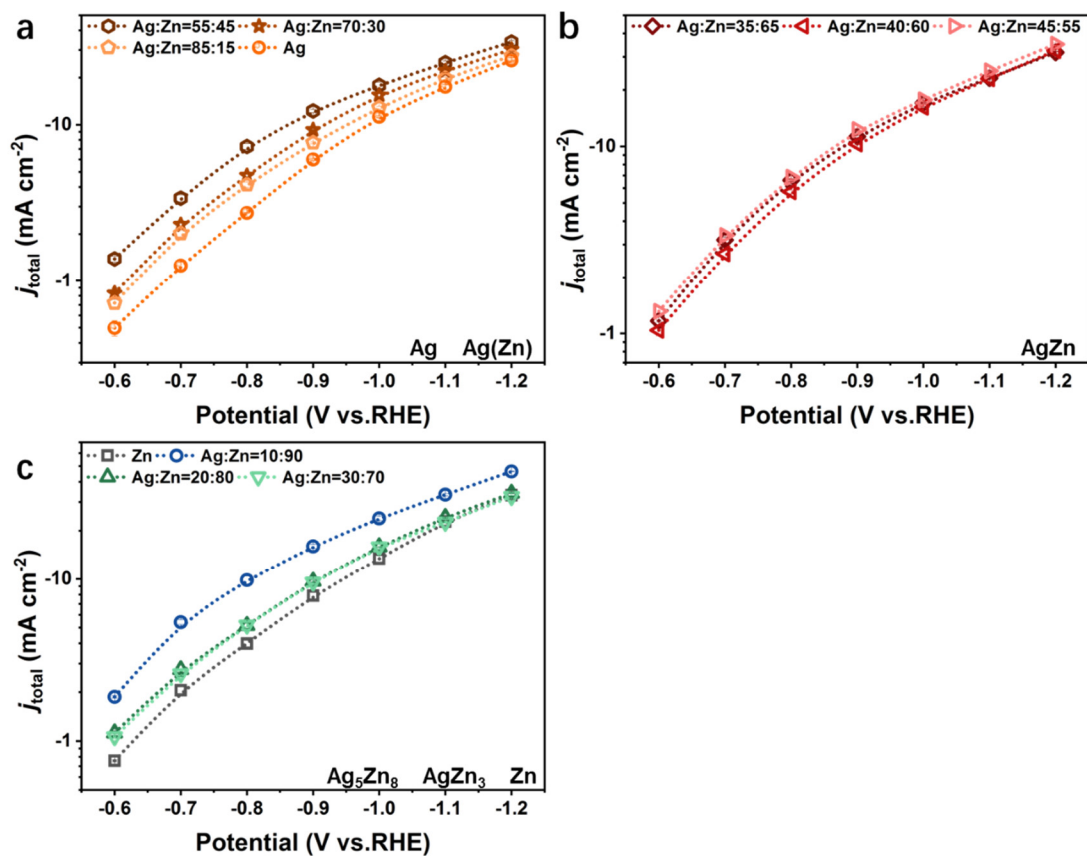

Figure S8.  $j_{total}$  for the (a) Ag, Ag(Zn), (b) AgZn, (c) Ag<sub>5</sub>Zn<sub>8</sub>, AgZn<sub>3</sub>, and Zn phase catalysts.



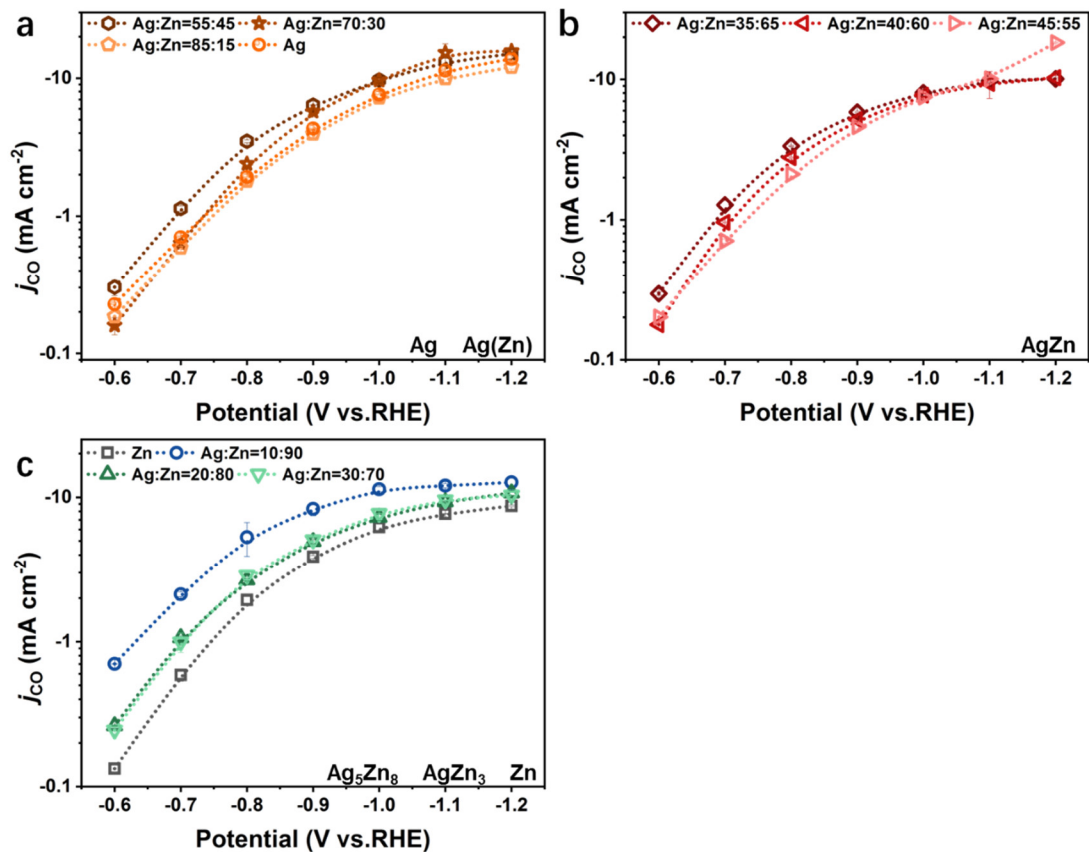

Figure S9.  $j_{CO}$  for the (a) Ag, Ag(Zn), (b) AgZn, (c) Ag<sub>5</sub>Zn<sub>8</sub>, AgZn<sub>3</sub>, and Zn phase catalysts.

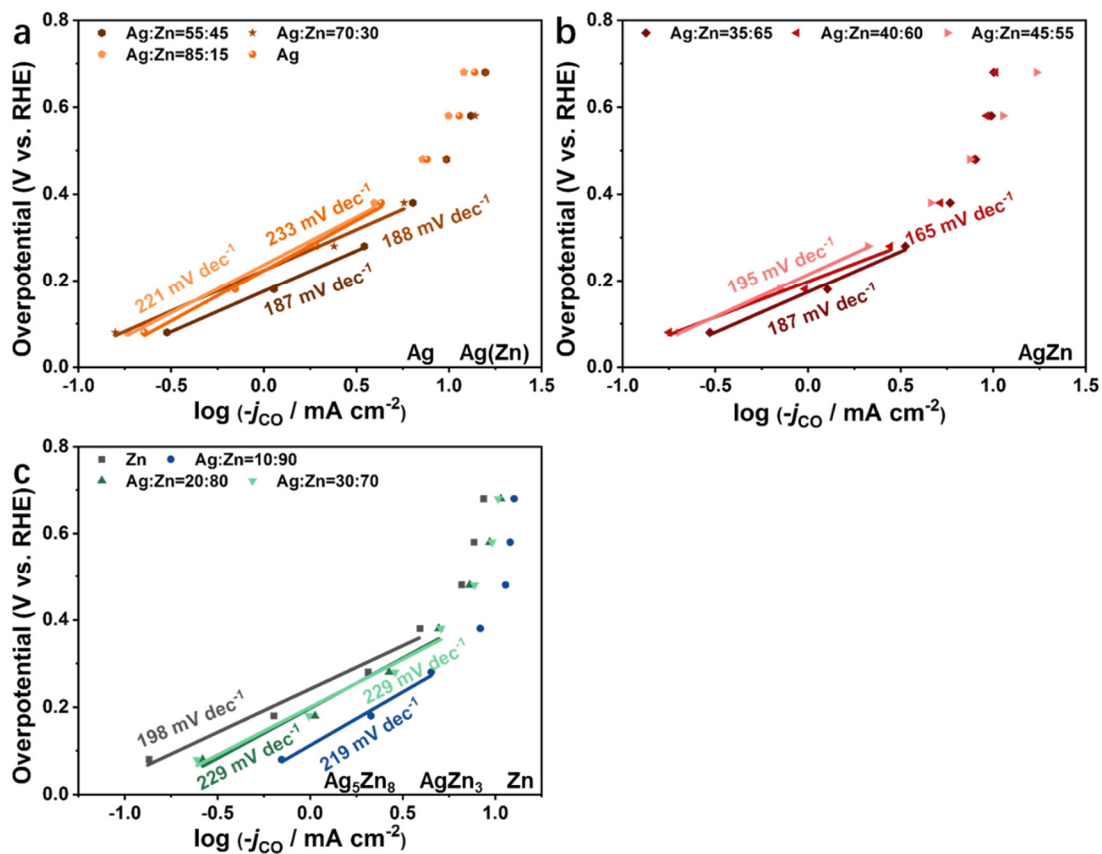

Figure S10. Tafel plots of the (a) Ag, Ag(Zn), (b) AgZn, (c) Ag<sub>5</sub>Zn<sub>8</sub>, AgZn<sub>3</sub> and Zn phase catalysts.

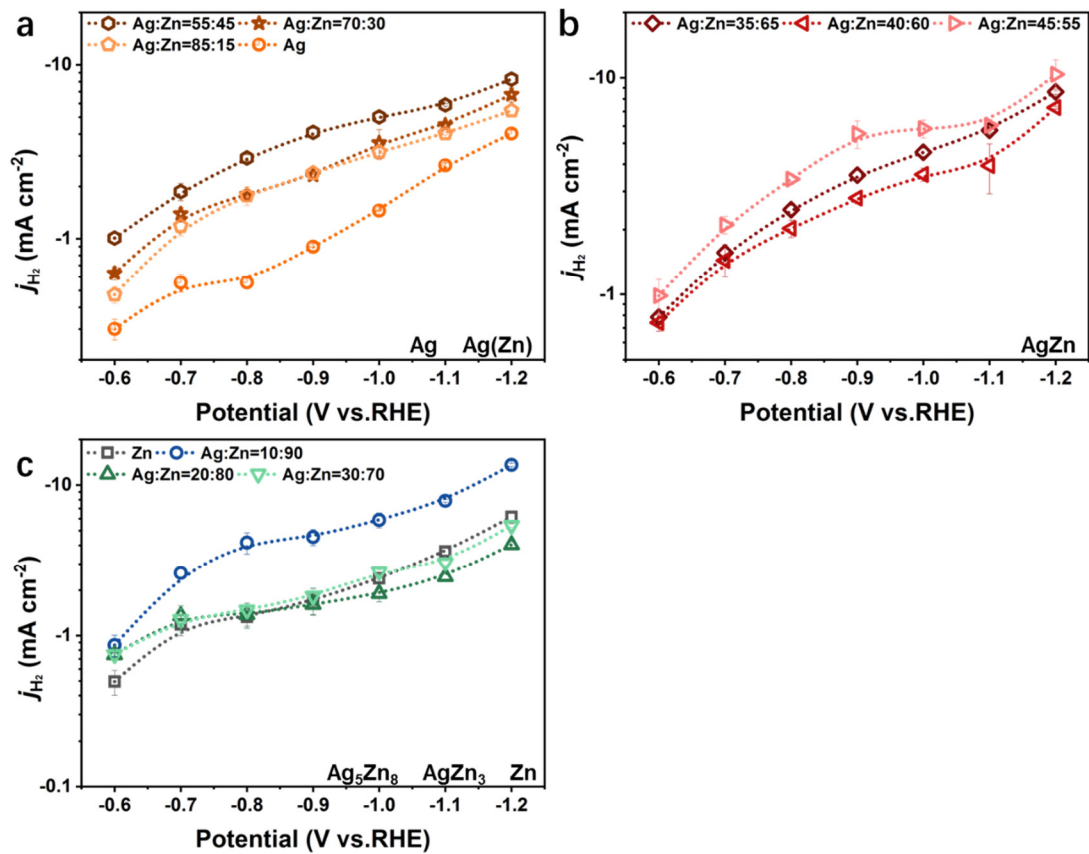

Figure S11.  $j_{H_2}$  for the (a) Ag, Ag(Zn), (b) AgZn, (c) Ag<sub>5</sub>Zn<sub>8</sub>, AgZn<sub>3</sub>, and Zn phase catalysts.
